# Supplementary material
Source: publisher site journal article supplement (https://www.spandidos-publications.com/4221/downloadSupplementary)
Supplement: Supplementary file 1 [file downloadSupplementary]

## Sheet: heatmap
Table SI. Abundance of OTUs.
	HE1	HE2	HE3	HE4	HE5	HE6	HE7	HE8	HE9	HE10	HE11	HE12	HE13	HE14	HE15	D160801	D160901	D161004	D161005	D161007	D170102	D170103	D170201	D170302	D170402	D170403	D170407	D170502	D170903	D180102	D180304	D180305	D180602	D180702	D180801	D180902	D181003
OTU1	0.0961997	0.305163	0.112885	0.0484016	0.241375	0.192649	0.341559	0.0591522	0.158814	0.127232	0.287699	0.172797	0.165419	0.21327	0.251267	0	0	0	0	0	0	0	0	0	0	0	0	0	0	0	0.124214	0.0329772	0.221308	0.319929	0.162251	0.0896639	0.305764
OTU2	0.102468	0.106685	0.1301	0.0274306	0.088418	0.240799	0.156152	0.240354	0.337967	0.185224	0.165068	0.0862373	0.186153	0.154937	0.125469	0	0	0	0	0	0	0	0	0	0	0	0	0	0	0	0.0322605	0.115142	0.0333398	0.0800612	0.0511061	0.0218942	0.195068
OTU3	0.0754898	0.159625	0.104325	0.049408	0.0708292	0.0607026	0.151857	0.108628	0.0807243	0.126797	0.0618489	0.0772066	0.148922	0.0996559	0.169112	0	0	0	0	0	0	0	0	0	0	0	0	0	0	0	0.183231	0.288211	0.261364	0.102287	0.158419	0.0850981	0.106366
OTU4	0.143252	0.0868996	0.0852748	0.0246308	0.113813	0.10964	0.0402457	0.150674	0.0817728	0.0616601	0.0641401	0.0792339	0.0962306	0.0372817	0.0202445	0	0	0	0	0	0	0	0	0	0	0	0	0	0	0	0.228967	0.158386	0.126868	0.130598	0.214785	0.200613	0.113363
OTU5	0.0703038	0.0575301	0.173832	0.101634	0.0830449	0.0168264	0.0479698	0.0452516	0.0535429	0.120504	0.146126	0.125432	0.0991682	0.118824	0.11282	0	0	0	0	0	0	0	0	0	0	0	0	0	0	0	0.059227	0.0361113	0.0233783	0.0399912	0.059325	0.0757055	0.0260606
OTU7	0.129892	0.0148358	0.108476	0.0630776	0.0629751	0.0950761	0.0064417	0.0370731	0.0325317	0.0213994	0.0137189	0.103546	0.0108228	0.0155327	0.00751715	0	0	0	0	0	0	0	0	0	0	0	0	0	0	0	0.063002	0.0459149	0.030827	0.0357509	0.0186529	0.030417	0.0429679
OTU6	0.00382944	0.0928138	0.0206912	0.00567277	0.0190427	0.00117316	0.031448	0.00383463	0.0145452	0.0438766	0.0731343	0.0285052	0.0394106	0.0412095	0.0564806	0	0	0	0	0	0	0	0	0	0	0	0	0	0	0	0.0392841	0.00926326	0.0287928	0.0587966	0.0398997	0.0433535	0.012627
OTU54	0.0416259	0.0242611	0.0236839	0.00435523	0.0458288	0.0401555	0.0120484	0.0301378	0.0426945	0.0160973	0.0389651	0.0217321	0.0330561	0.0378011	0.0122879	0	0	0	0	0	0	0	0	0	0	0	0	0	0	0	0.0470146	0.0110542	0.0209402	0.0470846	0.0384716	0.0417446	0.0103386
OTU21	0.0253121	0.0140732	0.00521303	0.188958	0.0155028	0.0148153	0.035668	0.0281007	0.006587	0.0263016	0.00796949	0.00721844	0.0259284	0.0305785	0.0250781	0	0	0	0	0	0	0	0	0	0	0	0	0	0	0	0.0220635	0.0121194	0.0289723	0.0126736	0.0101134	0.0196982	0.0164299
OTU30	0.0398056	0.00637465	0.012035	0.0563983	0.0495109	0.0494402	0.0021025	0.0266477	0.00149216	0.00474576	0.00173621	0.0679455	0.00126782	0.00170421	0.00439416	0	0	0	0	0	0	0	0	0	0	0	0	0	0	0	0.0154911	0.0829062	0.0445428	0.0120431	0.0376556	0.0134365	0.0152116
OTU11	0.0335033	0.001957	0.0390494	0.0724834	0.0687906	0.0185359	0.00493566	0.0135111	0.0107946	0.0150369	0.00239085	0.0653192	0.00384984	0.0108907	0.0107971	0	0	0	0	0	0	0	0	0	0	0	0	0	0	0	0.00685817	0.00582042	0.00459189	0.0049654	0.0172685	0.135844	0.00223894
OTU28	0.0982604	0.00743949	0.0101043	0.0119311	0.0213341	0.0263123	0.0102888	0.0582085	0.0427751	0.037601	0.00708715	0.0107048	0.0180123	0.0542589	0.0131354	0	0	0	0	0	0	0	0	0	0	0	0	0	0	0	0.00557979	0.00745693	0.00566882	0.00764514	0.0149078	0.0360917	0.00498823
OTU9	0.0174815	0.0164043	0.0182778	0.0105221	0.0149339	0.00321781	0.0204882	0.0132564	0.00915458	0.0348023	0.0132066	0.00913824	0.0319274	0.0297994	0.0294879	0	0	0	0	0	0	0	0	0	0	0	0	0	0	0	0.013205	0.0365744	0.0181282	0.0136036	0.0458454	0.0476801	0.00413216
OTU10	0.00218089	0.00424497	0.00122281	0.209636	0.00502536	0.00527921	0.0203689	0.00567705	0.000967885	0.00528466	0.0185291	0.00222697	0.0162652	0.00707654	0.0214058	0	0	0	0	0	0	0	0	0	0	0	0	0	0	0	0.0247857	0.00629902	0.0439595	0.0207443	0.00150098	0.022242	0.0158866
OTU17	0.00843165	0.00710853	0.024247	0.0119494	0.0177152	0.00355299	0.00234108	0.022124	0.00752799	0.0238853	0.0279217	0.0543687	0.00799344	0.00426865	0.0069208	0	0	0	0	0	0	0	0	0	0	0	0	0	0	0	0.067544	0.0443556	0.00435257	0.0240073	0.00579989	0.00506588	0.00982829
OTU8	0	0	0	0	0	0	0	0	0	0	0	0	1.54612e-05	0	0	0.0336907	6.08976e-05	0.0525872	0.0021606	0.0354299	0.859826	0.212777	0	0.102003	0.26261	0.0395298	0.120092	0.20374	0.00332502	0.566372	0	0	0	0	0	0	0
OTU12	0.00813971	0.0118715	0.008801	0.00362325	0.0115836	0.0283234	0.0258414	0.0147543	0.00803882	0.0120991	0.0168782	0.00715701	0.0156622	0.0269915	0.0126803	0	0	0	0	0	0	0	0	0	0	0	0	0	0	0	0.00988119	0.0177083	0.0109039	0.0180804	0.0403661	0.0339827	0.00974598
OTU23	0.00307386	0.02688	0.00995945	0.00279979	0.00491474	0.00440772	0.0122571	0.0135261	0.00560567	0.0305432	0.00402744	0.0129318	0.0279693	0.0231773	0.0407087	0	0	0	0	0	0	0	0	0	0	0	0	0	0	0	0.0085276	0.0125826	0.0302736	0.0171188	0.0131882	0.0178502	0.0164299
OTU16	0.0235434	0.00339598	0.0487354	0.00323897	0.0201805	0.0085473	0.001178	0.0274715	0.0139537	0.00603216	0.00559287	0.0147901	0.000525681	0.00118483	0.00175766	0	0	0	0	0	0	0	0	0	0	0	0	0	0	0	0.0190254	0.0495893	0.0198035	0.00773972	0.0179389	0.0178936	0.00464251
OTU13	0	0	0	0	0	0	0	0	0	0	0	0	0	0	0	0.190914	0.0869009	0.000481348	0.585164	0.0266537	0	0.00150319	0.916729	0.000918949	0	0.399853	0.0150115	0.254921	0.520089	0.00126422	0	0	0	0	0	0	0
OTU22	0	0	0	0	0	0	0	0	0	0	0	0	0	0	0	0.129658	0.105353	0.0351384	0.0669788	0.0872745	0.0482735	0.691094	0.0030128	0.580592	0.230717	0.0531962	0.0796767	0	0.3422	0	0	0	0	0	0	0	0
OTU14	0.00439613	0.0187354	0.0116328	0.00821637	0.00488314	0.00194409	0.0131667	0.0102307	0.00755488	0.0232073	0.0179171	0.0240052	0.0123071	0.00373304	0.0141084	0	0	0	0	0	0	0	0	0	0	0	0	0	0	0	0.0175816	0.0140184	0.0280898	0.00742445	0.0247297	0.00291342	0.00989414
OTU15	0.0346882	0.00467666	0.00242953	0.00462971	0.00126424	0.00589931	0.0081416	0.012852	0.0419417	0.0238331	0.00216315	0.0091536	0.0100807	0.0403006	0.0341018	0	0	0	0	0	0	0	0	0	0	0	0	0	0	0	0.00129343	0.00135861	0.00189958	0.00321569	0.00849582	0.0216767	0.00149812
OTU26	0	0	0	0	0	0	0	0	0	0	0	0	0	0	0	0.302705	0.0308751	0.000120337	0.0198055	0.839265	0.0493984	0.0651635	0.0214244	0.233229	0.313278	0.0330639	0.100462	0.26378	0.0723192	0	0	0	0	0	0	0	0
OTU33	0.000635379	0.0112959	0.0166366	0.00272659	0.00600515	0.0182007	0.0286298	0.0188736	0.00239283	0.0327336	0.0102749	0.007971	0.0106682	0.0178699	0.00696788	0	0	0	0	0	0	0	0	0	0	0	0	0	0	0	0.00145887	0.00109615	0.00140599	0.0145179	0.00240448	0.0108492	0.020562
OTU31	0	0	0	0	0	0	0	0	0	0	0	0	0	0	0	0.000510465	0.77681	0	0.0921858	0.0113766	0.00445075	0.0143555	0.0310486	0.014887	0	0.01205	0.578522	0.156496	0.0199501	0.432364	0	0	0	0	0	0	0
OTU38	0	0	0	0	0	0	0	0	0	0	0	0	0	0	0	0.342522	0	0.911673	0.233705	0	0.0380515	0.0151071	0.0277848	0.0683698	0.193395	0.462307	0.106236	0.121063	0.0421169	0	0	0	0	0	0	0	0
OTU19	0.0218605	0.0049069	0.0285268	0.047633	0.0163719	0.0173292	0.00541282	0.0149641	0.0124077	0.0133681	0.00264701	0.0101519	0.00329324	0.00431734	0.00580656	0	0	0	0	0	0	0	0	0	0	0	0	0	0	0	0.00115807	0.00838325	0.00179488	0.00264821	0.00504211	0.00476149	0.00391815
OTU40	0.0135834	0.00800069	0.00374887	0.00230571	0.00914995	0.0310719	0.0092003	0.00677052	0.025165	0.00756193	0.0105169	0.00213482	0.00570519	0.0106797	0.00566532	0	0	0	0	0	0	0	0	0	0	0	0	0	0	0	0.00160926	0.0007565	0.0013312	0.00619493	0.0114249	0.0170892	0.0317567
OTU18	0.00204351	0.00482056	0.000112627	0.038337	0.00750644	0.00610042	0.0122571	0.0379269	0.00104854	0.000173837	0.000441168	9.21503e-05	0.0293454	0.0146562	0.0117858	0	0	0	0	0	0	0	0	0	0	0	0	0	0	0	0.00673786	0.00191441	0.00746369	0.0128785	0.000408032	0.00443536	0.0202822
